# Supplementary material
Source: publisher figshare collection journal article supplement (https://sage.figshare.com/ndownloader/files/17636672)

## Supplemental Material

### Identification of a Glass Substrate to Study Cells Using Fourier Transform Infrared Spectroscopy: Are We Closer to Spectral Pathology?

Abigail V. Rutter<sup>1</sup>, Jamie Crees<sup>2</sup>, Helen Wright<sup>3</sup>, Marko Raseta<sup>4</sup>, Daniel G. van Pittius<sup>5</sup>, Paul Roach<sup>6</sup>, and Josep Sulé-Suso<sup>1,7</sup>

<sup>1</sup>Keele University, Guy Hilton Research Centre, Thornburrow Drive, Stoke on Trent ST4 7QB, UK

<sup>2</sup>Histopathology Department, Royal Derby Hospital, Uttoxeter Road, Derby DE22 3NE, UK

<sup>3</sup>Directorate of Research, Innovation and Engagement, Keele University, Keele, Staffordshire ST5 5BG, UK

<sup>4</sup>Institute for Primary Care and Health Sciences and Research Design Service, Keele University, Keele, Staffordshire ST5 5BG, UK

<sup>5</sup>Histopathology Department, Royal Stoke University Hospital, University Hospitals of North Midlands (UHNM), Newcastle Rd, Stoke on Trent, Staffordshire ST4 6QG, U

<sup>6</sup>Department of Chemistry, Loughborough University, Loughborough, Leicestershire LE11 3TU, UK

<sup>7</sup>Oncology Department, Royal Stoke University Hospital, University Hospitals of North Midlands, Newcastle Rd, Stoke on Trent, Staffordshire ST4 6QG, UK

Corresponding author email: josep.sulesuso@uhnm.nhs.uk

Figure S1. Representative image of (a) PBMC, (b) K56, and (c) CALU-1 cells cytopun onto GalvOptics coverslips.

(a)

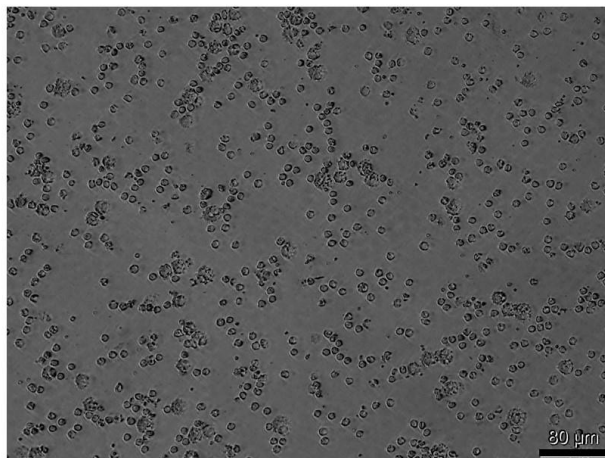

(b)

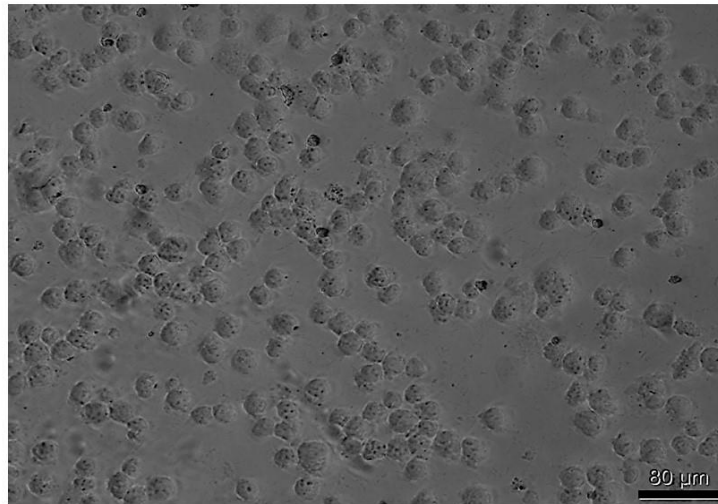

(c)

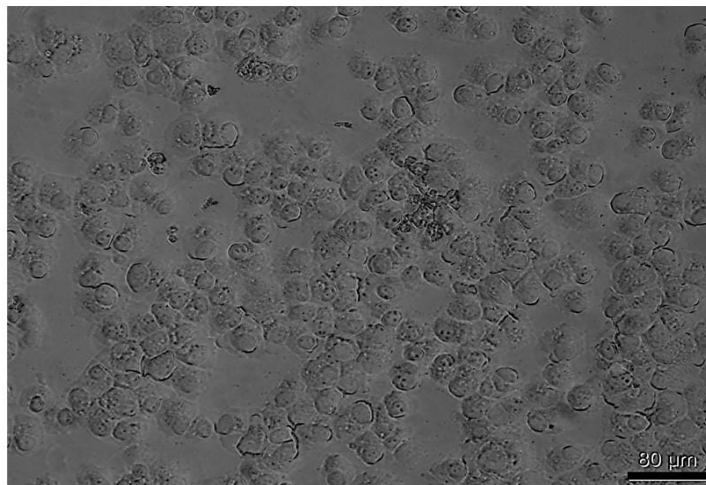

Supplement: Supplementary file 1 [file 17636672]
